1

Original Investigation

2

3

**No associations between physical activity and clinical outcomes among hospitalized**

4

**patients with severe COVID-19**

5

6

Ana J. Pinto<sup>1\*</sup>; Karla F. Goessler<sup>1\*</sup>; Alan L. Fernandes<sup>2</sup>; Igor H. Murai<sup>2</sup>; Lucas P. Sales<sup>2</sup>;

7

Bruna Z. Reis<sup>2</sup>; Mayara Diniz Santos<sup>2</sup>; Hamilton Roschel<sup>1</sup>; Rosa M. R. Pereira<sup>2</sup>; Bruno

8

Gualano<sup>1,3</sup>

9

10 \*Both authors equally contributed to the manuscript

11

12 <sup>1</sup> Applied Physiology and Nutrition Research Group, School of Physical Education and Sport;

13 Clinical Hospital HCFMUSP, School of Medicine FMUSP, University of Sao Paulo, Sao

14 Paulo-SP, Brazil

15 <sup>2</sup> Rheumatology Division, Clinical Hospital HCFMUSP, School of Medicine FMUSP,

16 University of Sao Paulo, Sao Paulo-SP, Brazil

17 <sup>3</sup> Food Research Center, University of Sao Paulo, Sao Paulo-SP, Brazil

18

19 **Corresponding author (to whom reprint requests should be addressed):**

20 Prof. Dr. Bruno Gualano

21 Rheumatology Division, Faculdade de Medicina FMUSP, Universidade de Sao Paulo, Sao

22 Paulo, SP, BR. Av. Dr. Arnaldo, 455 – Pacaembu - São Paulo, SP – Brasil; postal code:

23 01246-903. Phone: + 55 11 3061-8789; e-mail: [gualano@usp.br](mailto:gualano@usp.br)

24

25 **Abstract**

26

27 **Purpose:** This small-scale, prospective cohort study nested within a randomized controlled  
28 trial aimed to investigate the possible associations between physical activity levels and  
29 clinical outcomes among hospitalized patients with severe COVID-19.

30 **Methods:** Hospitalized patients with severe COVID-19 were recruited from Clinical Hospital  
31 of the School of Medicine of the University of Sao Paulo (a quaternary referral teaching  
32 hospital), and from Ibirapuera Field Hospital, both located in Sao Paulo, Brazil. Physical  
33 activity levels were assessed by Baecke Questionnaire of Habitual Physical Activity. The  
34 primary outcome was hospital length of stay. The secondary outcomes were: mortality,  
35 admission to the intensive care unit (ICU), and mechanical ventilation requirement.

36 **Results:** Mean hospital length of stay was  $8.5 \pm 7.1$  days; 3.3% of patients died, 13.8% were  
37 admitted to ICU, and 8.6% required mechanical ventilation. Linear regression models  
38 showed that physical activity indexes were not associated with hospital length of stay (work  
39 index:  $\beta=-0.57$  [95%CI: -1.80 to 0.65],  $p=0.355$ ; sport index:  $\beta=0.43$  [95%CI: -0.94 to 1.80],  
40  $p=0.536$ ; leisure-time index:  $\beta=1.18$  [95%CI: -0.22 to 2.59],  $p=0.099$ ; total activity index:  
41  $\beta=0.20$  [95%CI: -0.48 to 0.87],  $p=0.563$ . Physical activity indexes were not associated with  
42 mortality, admission to ICU and mechanical ventilation requirement (all  $p>0.05$ ).

43 **Conclusions:** Among hospitalized patients with COVID-19, physical activity did not  
44 associate with hospital length of stay or any other clinically-relevant outcomes. These  
45 findings suggest that previous physical activity levels may not change the prognosis of severe  
46 COVID-19.

47 **Keywords:** SARS-CoV-2; prognosis; lifestyle; physical inactivity.

48 **Introduction**

49

50 Physical inactivity has been considered a predisposing factor to acquired infections in  
51 several cohorts (1-3). A solid body of literature provides biological plausibility for the  
52 negative impact of physical inactivity on the immune system. For instance, chronic inactivity  
53 has been linked to increased systemic inflammation, impaired natural killer cell cytolytic  
54 activity (4), and reduced T-cell proliferation and cytokine production (5, 6), which can  
55 ultimately lead to a loss of viral control (7).

56 The immunoregulatory role of physical activity is also well known. Regular physical  
57 activity has been postulated to improve, or at least maintain, immunity across the life span  
58 (8). Evidence has also pointed out that physical activity is able to reduce the incidence and  
59 the number and severity of symptoms associated with acute respiratory infections (e.g., upper  
60 respiratory tract infection) (9).

61 The link between physical (in)activity and COVID-19 remains to be properly  
62 established. A recent study showed that physical inactivity increases the relative risk for  
63 COVID-19 hospital admission in a UK cohort by 32% (10), suggesting that the adoption of  
64 an active lifestyle could lower the risk of severe infection. Nonetheless, it is unclear whether  
65 physical activity confers a better prognosis to patients hospitalized with severe COVID-19.

66 This small-scale, prospective cohort study aimed to investigate the possible  
67 associations between physical activity levels and clinical outcomes (hospital length of stay,  
68 mortality, intensive care unit (ICU) admission and mechanical ventilator requirement) among  
69 hospitalized patients with severe COVID-19.

70

71 **Methods**

72

### 73 **Study design**

74 This is a prospective, cohort study nested within a multicenter, randomized controlled  
75 trial designed to test the safety and efficacy of vitamin D<sub>3</sub> supplementation in hospitalized  
76 patients with severe COVID-19 (ClinicalTrials.gov Identifier: NCT04449718), conducted  
77 between June 2, 2020 and October 7, 2020. We assessed patients' clinical status, coexisting  
78 chronic diseases, demographic characteristics, self-reported body weight and height,  
79 ethnicity, and physical activity upon hospital admission. Clinical outcomes were assessed  
80 through medical records.

81

### 82 **Patients**

83 Hospitalized patients were recruited from the Clinical Hospital of the School of  
84 Medicine of the University of Sao Paulo (a quaternary referral teaching hospital), and from  
85 Ibirapuera Field Hospital, both located in Sao Paulo, Brazil. Inclusion criteria were: 1) adults  
86 aged 18 years or older; 2) diagnosis of COVID-19 by either polymerase chain reaction (PCR)  
87 for severe acute respiratory syndrome coronavirus 2 (SARS-CoV-2) from nasopharyngeal  
88 swabs or computed tomography scan findings (bilateral multifocal ground-glass opacities  $\geq$   
89 50%) compatible with the disease; 3) diagnosis of flu syndrome with hospitalization criteria  
90 on hospital admission, presenting with respiratory rate  $\geq$  24 breaths per minute, saturation  $<$   
91 93% on room air or risk factors for complications, such as heart disease, diabetes mellitus,  
92 systemic arterial hypertension, neoplasms, immunosuppression, pulmonary tuberculosis, and  
93 obesity, followed by COVID-19 confirmation. Exclusion criteria were: 1) patient unable to  
94 read and sign the written informed consent; 2) patient already admitted under invasive  
95 mechanical ventilation; 3) previous vitamin D<sub>3</sub> supplementation ( $>$  1000 IU/day); 4) renal  
96 failure requiring dialysis or creatinine  $\geq$  2.0 mg/dL; 5) hypercalcemia defined by total

97 calcium > 10.5 mg/dL; 6) pregnant or lactating women; and 7) patients with expected  
98 hospital discharge in less than 24 hours upon admission.

99 The study was approved by the Ethics Committee of Clinical Hospital of the School  
100 of Medicine of the University of Sao Paulo and by the Ethics Committee of Ibirapuera Field  
101 Hospital. All the procedures were conducted in accordance with the Declaration of Helsinki.  
102 The participants provided written informed consent before being enrolled in the study  
103 (approval number: 30959620.4.0000.0068).

104

### 105 **Outcome measures**

106 Physical activity levels were assessed by Baecke Questionnaire of Habitual Physical  
107 Activity (11), which has been previously validated to the Brazilian population (12). The  
108 questionnaire consists of 3 sections: work, sport, and leisure-time activity. Scores in each  
109 section range between 0 and 5, where higher scores indicate a higher physical activity level.  
110 A total activity index is obtained by summing all scores (maximum score = 15).

111 The primary outcome was hospital length of stay, defined as the total number of days  
112 that patients remained hospitalized from the date of hospital admission until the date of  
113 hospital discharge or death. The criteria used for patient discharge were: 1) no need for  
114 supplemental oxygen in the last 48 hours; 2) no fever in the last 72 hours; and 3) oxygen  
115 saturation > 93% in room air without respiratory distress. The secondary outcomes were: 1)  
116 mortality; 2) admission to the ICU; and 3) mechanical ventilation requirement.

117

### 118 **Statistical Analysis**

119 Associations between physical activity levels (independent variables) and hospital  
120 length of stay (primary outcome) were tested using linear regression models, whereas  
121 associations between physical activity levels and mortality, admission to ICU, and

122 mechanical ventilation requirement (secondary outcomes) were tested using logistic  
123 regression models. In a sensitivity analysis for the primary outcome, patients were divided  
124 into tertiles according to total activity index. Then, potential differences between tertiles were  
125 assessed by generalized estimating equations (GEE) model, based on the assumption of a  
126 normal distribution, identity link function, and an exchangeable working correlation, with  
127 group (lower, mid, and upper tertiles) as fixed factor. All regression and GEE models were  
128 adjusted for potential confounders (i.e., age, sex, BMI, and number of comorbidities). For the  
129 primary outcome, models were also adjusted for mortality. Statistical analyses were  
130 performed in SAS, version 9.4. Data are expressed as  $\beta$  and 95% confidence interval (95%CI)  
131 or odds ratio (OR) and 95%CI. Significance level was set at  $p=0.050$ .

132

## 133 **Results**

134

### 135 **Patients**

136 Two-hundred and nine patients had complete physical activity data and were included  
137 in this study. Patients' age was  $54.9 \pm 14.5$  years, BMI was  $31.0 \pm 6.5$  kg/m<sup>2</sup>, 51.7% were  
138 men, 48.3% were white, 48.8% had hypertension, 28.7% had diabetes, and 11.5% had  
139 cardiovascular diseases (Table 1). Seventy-three percent required supplemental oxygen (134  
140 were on oxygen therapy and 19 were on non-invasive ventilation), and 62.2% had computed  
141 tomography scan findings suggestive of COVID-19. Mean hospital length of stay was  $8.5 \pm$   
142  $7.1$  days, 3.3% of patients died, 13.8% were admitted to ICU, and 8.6% required mechanical  
143 ventilation. Mean work index was  $2.1 \pm 0.8$  (range: 0.9 to 3.8), sport index was  $2.0 \pm 0.7$   
144 (range: 1.0 to 4.3), leisure-time index was  $2.5 \pm 0.7$  (range: 1.0 to 4.3), and total activity  
145 index was  $6.6 \pm 1.5$  (range: 3.1 to 11.1).

146

## 147 **Primary Outcome**

148 Linear regression models showed that physical activity indexes were not associated  
149 with hospital length of stay (work index:  $\beta=-0.50$  [95%CI: -1.60 to 0.60],  $p=0.368$ ; sport  
150 index:  $\beta=0.09$  [95%CI: -1.14 to 1.32],  $p=0.8823$ ; leisure-time index:  $\beta=0.90$  [95%CI: -0.37 to  
151 2.17],  $p=0.162$ ; total activity index:  $\beta=0.07$  [95%CI: -0.53 to 0.68],  $p=0.810$ ; Figure 1A).

152 Lower (5.0 [95%CI: 4.9 to 5.2]), mid (6.6 [95%CI: 6.5 to 6.8]), and upper (8.3  
153 [95%CI: 8.1 to 8.4]) tertiles significantly differed in respect of total activity index ( $p<0.001$ ).  
154 Sensitivity analysis showed that hospital length of stay was comparable between lower (8.5  
155 days [95%CI: 7.0 to 10.0]), mid (8.4 days [95%CI: 7.0 to 9.9]) and upper (8.0 days [95%CI:  
156 6.5 to 9.4]) tertiles of total activity index ( $p=0.875$ ; Figure 1B).

157

## 158 **Secondary Outcomes**

159 Logistic regression models showed that physical activity indexes were not associated  
160 with mortality (work index: OR=1.1 [95%CI: 0.3 to 3.8],  $p=0.936$ ; sport index: OR=0.4  
161 [95%CI: 0.1 to 1.5],  $p=0.192$ ; leisure-time index: OR=0.5 [95%CI: 0.1 to 2.1],  $p=0.342$ ; total  
162 activity index: OR=0.7 [95%CI: 0.4 to 1.3],  $p=0.272$ ), admission to ICU (work index: OR=  
163 1.1 [95%CI: 0.6 to 2.0],  $p=0.697$ ; sport index: OR=0.9 [95%CI: 0.5 to 1.8],  $p=0.867$ ; leisure-  
164 time index: OR=0.5 [95%CI: 0.3 to 1.1],  $p=0.077$ ; total activity index: OR=0.9 [95%CI: 0.7  
165 to 1.2],  $p=0.459$ ), and mechanical ventilation requirement (work index: OR=0.6 [95%CI: 0.3  
166 to 1.2],  $p=0.176$ ; sport index: OR=0.9 [95%CI: 0.4 to 2.0],  $p=0.844$ ; leisure-time index:  
167 OR=0.7 [95%CI: 0.3 to 1.6],  $p=0.413$ ; total activity index: OR=0.8 [95%CI: 0.5 to 1.2],  
168  $p=0.214$ ; Figure 2).

169

## 170 **Discussion**

171

172           This small-scale, prospective, cohort study provided novel evidence that physical  
173 activity levels do not associate with hospital length of stay or any other relevant clinical  
174 outcomes among patients with severe COVID-19.

175           The negative impact of physical inactivity on the immune system has been widely  
176 reported (4-7). Inactivity has been associated with higher rates of viral and bacterial  
177 infections, immunosenescence, and poor vaccine responses (4-7). In addition, inactivity is  
178 closely related to obesity, a condition that predisposes to poor antibody responses to  
179 vaccination (13, 14) and impaired lymphocyte proliferation following mitogenic stimulus  
180 (15). These immunological disturbances, among others, experienced by obese people are  
181 implied in a greater risk of viral and bacterial infections as well as longer hospital length of  
182 stay due to more frequent and prolonged complications following surgery (16, 17). This body  
183 of literature has supported the speculation that physical inactivity could be a risk factor for  
184 COVID-19 as well.

185           A few recent studies have supported this hypothesis. A large-scale, observational  
186 study involving individuals residing in England showed that physical inactivity and obesity  
187 account for up to 8.6% and 29.5%, respectively, of the population attributable fraction of  
188 severe COVID-19 (10), defined as a case requiring hospital admission. These findings are  
189 corroborated by another study showing that being physical active is associated with a 35%  
190 reduction in hospitalization due to COVID-19 in Brazil (18). While these studies suggest that  
191 physical activity may prevent hospital admission due to COVID-19, it remained to be  
192 investigated the influence of lifestyle on the prognosis in already hospitalized patients.

193           This study aimed to address this gap by following a small cohort of hospitalized  
194 patients with severe COVID-19. We showed that physical activity levels did not associate  
195 with hospital length of stay or any clinical outcome. It is difficult to contrast these findings  
196 with others since there is a lack of analogous studies involving COVID-19 patients. However,



197 among patients with cardiovascular disease, higher physical activity level was related to a  
198 slightly shorter hospital stay (0.9 day) (19). A similar conclusion was reached by another  
199 study that observed that physical inactivity was a predictor of longer hospital lengths of stay  
200 among community-dwelling older adults (3.18 vs 0.82 days in active individuals) (20). One  
201 may speculate that the main factor underlying the contrasting outcomes found in these  
202 cohorts and in ours are the patients' characteristics. In fact, the longer hospital length of stay  
203 in the current study (8.5 days vs 2.6 (20) and 2.1 days (19)) appears to indicate that our  
204 patients were more severe than those of the other cohorts. Furthermore, it is possible to  
205 conjecture that the protective effect of physical activity may be less pronounced in acute  
206 infectious diseases, such as COVID-19, as compared to chronic conditions, such as  
207 cardiovascular diseases (19).

208         The main strength of this study involves its novelty in assessing the influence of  
209 physical activity levels, using a validated questionnaire, in a hospitalized cohort of patients  
210 with severe COVID-19 and several comorbidities (see Table 1).

211         The main limitations of this study involve its observational nature, which hampers  
212 causative relationships; the small sample size, which increases the chances of type 2 errors,  
213 particularly considering the low incidence for the secondary outcomes; the use of a  
214 questionnaire to assess physical activity, which is prone to recall bias, overreporting, and  
215 limited time frame of evaluation (i.e., 1 year); and the lack of patients' follow-up after the  
216 hospital discharge.

217         In conclusion, among hospitalized patients with COVID-19, physical activity did not  
218 associate with hospital length of stay or any other clinically relevant outcomes. These  
219 findings, which needs further replication in larger cohorts, suggest that previous physical  
220 activity levels may not change the prognosis of severe COVID-19.

221

222 **Acknowledgments**

223 A.J.P., K.F.G., I.H.M., A.L.F., R.M.R.P., and B.G. were supported by São Paulo Research  
224 Foundation – FAPESP (grants #2015/26937-4, #2019/18039-7, #2019/24782-4;  
225 #2020/11102-2, #2016/00006-7 and #2020/05752-4, and #2017/13552-2). R.M.R.P., H.R.,  
226 and B.G. were supported by Conselho Nacional de Desenvolvimento Científico e  
227 Tecnológico (grants 305556/2017-7, 301571/2017-1, and 305242/2019-9).

228

229 **Conflict of interest**

230 The authors declare no conflict of interests. Additionally, authors declare that results of the  
231 study are presented clearly, honestly, and without fabrication, falsification, or inappropriate  
232 data manipulation. Finally, the results of the present study do not constitute endorsement by  
233 ACSM.

234

235 **References**

236

- 237 1. Hamer M, O'Donovan G, Stamatakis E. Lifestyle risk factors, obesity and infectious  
238 disease mortality in the general population: Linkage study of 97,844 adults from  
239 England and Scotland. *Prev Med.* 2019;123:65-70.
- 240 2. Paulsen J, Askim A, Mohus RM et al. Associations of obesity and lifestyle with the  
241 risk and mortality of bloodstream infection in a general population: a 15-year follow-  
242 up of 64 027 individuals in the HUNT Study. *Int J Epidemiol.* 2017;46(5):1573-81.
- 243 3. Wang HE, Baddley J, Griffin RL et al. Physical inactivity and long-term rates of  
244 community-acquired sepsis. *Prev Med.* 2014;65:58-64.

- 245 4. Jung YS, Park JH, Park DI, Sohn CI, Lee JM, Kim TI. Physical inactivity and  
246 unhealthy metabolic status are associated with decreased natural killer cell activity.  
247 *Yonsei Med J.* 2018;59(4):554-62.
- 248 5. Murdaca G, Setti M, Brenci S et al. Modifications of immunological and neuro-  
249 endocrine parameters induced by antiorthostatic bed-rest in human healthy volunteers.  
250 *Minerva Med.* 2003;94(6):363-78.
- 251 6. Uchakin PN, Stowe RP, Paddon-Jones D, Tobin BW, Ferrando AA, Wolfe RR.  
252 Cytokine secretion and latent herpes virus reactivation with 28 days of horizontal  
253 hypokinesia. *Aviat Space Environ Med.* 2007;78(6):608-12.
- 254 7. Simpson RJ, Kunz H, Agha N, Graff R. Exercise and the Regulation of Immune  
255 Functions. *Prog Mol Biol Transl Sci.* 2015;135:355-80.
- 256 8. Turner JE. Is immunosenescence influenced by our lifetime "dose" of exercise?  
257 *Biogerontology.* 2016;17(3):581-602.
- 258 9. Simpson RJ, Campbell JP, Gleeson M et al. Can exercise affect immune function to  
259 increase susceptibility to infection? *Exerc Immunol Rev.* 2020;26:8-22.
- 260 10. Hamer M, Kivimaki M, Gale CR, Batty GD. Lifestyle risk factors, inflammatory  
261 mechanisms, and COVID-19 hospitalization: A community-based cohort study of  
262 387,109 adults in UK. *Brain Behav Immun.* 2020;87:184-7.
- 263 11. Baecke JA, Burema J, Frijters JE. A short questionnaire for the measurement of  
264 habitual physical activity in epidemiological studies. *Am J Clin Nutr.* 1982;36(5):936-  
265 42.
- 266 12. Florindo AA, Latorre MRDO, Jaime PC, Tanaka T, Zerbini CAF. Methodology to  
267 evaluation the habitual physical activity in men aged 50 years or more. *Rev Saude*  
268 *Publ.* 2004;38(2):307-14.

- 269 13. Clemens R, Sanger R, Kruppenbacher J et al. Booster immunization of low- and non-  
270 responders after a standard three dose hepatitis B vaccine schedule--results of a post-  
271 marketing surveillance. *Vaccine*. 1997;15(4):349-52.
- 272 14. Sheridan PA, Paich HA, Handy J et al. Obesity is associated with impaired immune  
273 response to influenza vaccination in humans. *International journal of obesity (2005)*.  
274 2012;36(8):1072-7.
- 275 15. Nieman DC, Henson DA, Nehlsen-Cannarella SL et al. Influence of obesity on  
276 immune function. *J Am Diet Assoc*. 1999;99(3):294-9.
- 277 16. Gottschlich MM, Mayes T, Khoury JC, Warden GD. Significance of obesity on  
278 nutritional, immunologic, hormonal, and clinical outcome parameters in burns. *J Am*  
279 *Diet Assoc*. 1993;93(11):1261-8.
- 280 17. Falagas ME, Kompoti M. Obesity and infection. *Lancet Infect Dis*. 2006;6(7):438-46.
- 281 18. de Souza FR, Motta-Santos D, Santos Soares Dd et al. Physical activity decreases the  
282 prevalence of COVID-19-associated hospitalization: Brazil EXTRA study. *medRxiv*.  
283 2020:2020.10.14.20212704.
- 284 19. Ek A, Kallings LV, Ekstrom M, Borjesson M, Ekblom O. Subjective reports of  
285 physical activity levels and sedentary time prior to hospital admission can predict  
286 utilization of hospital care and all-cause mortality among patients with cardiovascular  
287 disease. *Eur J Cardiovasc Nurs*. 2020:1474515120921986.
- 288 20. Woolcott JC, Ashe MC, Miller WC, Shi P, Marra CA, Team PR. Does physical  
289 activity reduce seniors' need for healthcare?: a study of 24 281 Canadians. *Br J Sports*  
290 *Med*. 2010;44(12):902-4.

292 **Figure legends**

293

294 **Figure 1.** Associations between physical activity level and hospital length of stay.

295 Data are presented as  $\beta$  (95%CI).

296

297 **Figure 2.** Associations between physical activity level and mortality, admission to ICU, and

298 mechanical ventilation requirement.

299 Data are presented as OR (95%CI).

1 **Table**

2 **Table 1.** Demographic and clinical characteristics.

|                                                       | n=209       |
|-------------------------------------------------------|-------------|
| Age, mean (SD), y                                     | 54.9 (14.5) |
| Sex, No. (%)                                          |             |
| Male                                                  | 108 (51.7)  |
| Female                                                | 101 (48.3)  |
| Race, No. (%)                                         |             |
| White                                                 | 101 (48.3)  |
| Brown                                                 | 78 (37.3)   |
| Black                                                 | 30 (14.4)   |
| Body mass index, mean (SD), kg/m <sup>2</sup> [n=192] | 31.0 (6.5)  |
| Underweight, No. (%)                                  | 2 (1.0)     |
| Normal, No. (%)                                       | 28 (14.6)   |
| Overweight, No. (%)                                   | 58 (30.2)   |
| Obesity, No. /total (%)                               | 104 (54.2)  |
| Acute COVID-19 symptoms, No. (%)                      |             |
| Fever                                                 | 149 (71.3)  |
| Cough                                                 | 177 (84.7)  |
| Fatigue                                               | 184 (88.0)  |
| Arthralgia                                            | 71 (34.0)   |
| Myalgia                                               | 144 (68.9)  |
| Nasal congestion                                      | 78 (37.3)   |
| Coryza                                                | 87 (41.6)   |
| Sore throat                                           | 69 (33.0)   |

It is made available under a [CC-BY-NC-ND 4.0 International license](#) .

|                                       |            |
|---------------------------------------|------------|
| Diarrhea                              | 95 (45.5)  |
| Coexisting diseases, No. (%)          |            |
| Hypertension                          | 102 (48.8) |
| Cardiovascular disease                | 24 (11.5)  |
| Diabetes                              | 60 (28.7)  |
| Chronic obstructive pulmonary disease | 7 (3.3)    |
| Asthma                                | 10 (4.8)   |
| Rheumatic disease                     | 17 (8.1)   |
| Concomitant medications, No. (%)      |            |
| Antibiotic                            | 207 (99.0) |
| Anticoagulant                         | 188 (90.0) |
| Analgesic                             | 139 (66.5) |
| Corticosteroids                       | 156 (74.6) |
| Antihypertensive                      | 101 (48.3) |
| Hypoglycemic                          | 42 (20.1)  |
| Hypolipidemic                         | 28 (13.4)  |
| Antiemetic                            | 117 (56.0) |
| Antiviral                             | 3 (1.4)    |
| Proton pump inhibitor                 | 112 (53.6) |
| Levothyroxine                         | 17 (8.1)   |
| Physical activity level, mean (SD)    |            |
| Work index                            | 2.1 (0.8)  |
| Sport index                           | 2.0 (0.7)  |
| Leisure-time index                    | 2.5 (0.7)  |
| Total activity index                  | 6.6 (1.5)  |

---

3 Data are expressed as mean (SD) or absolute and relative frequencies (n[%]).

**A**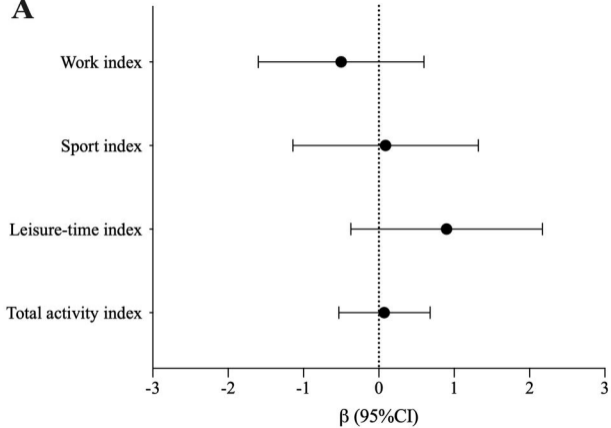**B**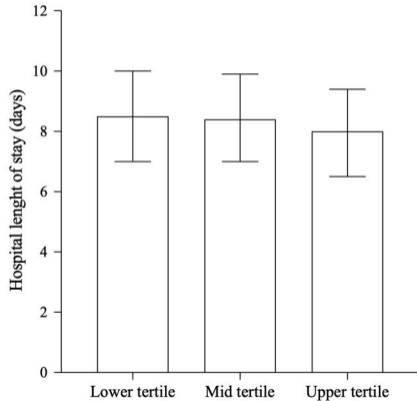



**Work index**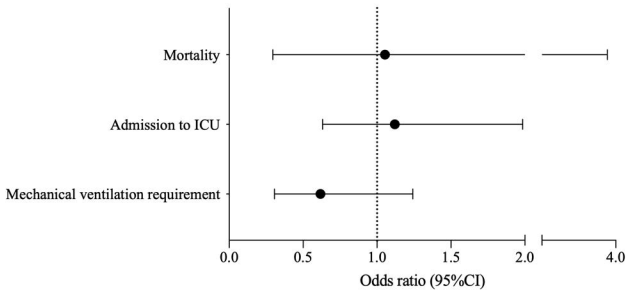**Sport index**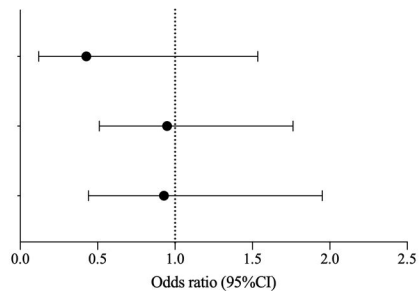**Leisure-time index**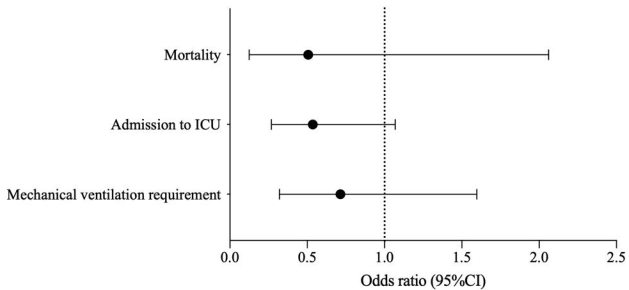**Total activity index**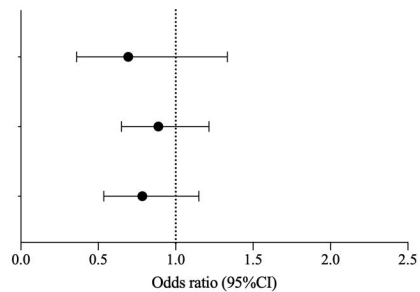

Source: https://medrxiv.org/content/medrxiv/early/2020/11/30/2020.11.25.20237925.full.pdf
